# Supplementary material for: Transcriptional profiling and immunophenotyping show sustained activation of blood monocytes in subpatent Plasmodium falciparum infection
Source: PubMed Central journal article supplement (PMC7302943; doi:10.1002/cti2.1144), 2020-06-18
Supplement: CTI2-9-e1144-s002.pdf [file CTI2-9-e1144-s002.pdf]

**Supplementary Table 1. List of significant DEGs in VIS cohort (FDR<0.05)**

| <b>Ensemble gene ID</b> | <b>Gene symbol</b> | <b>Ensemble gene ID</b> | <b>Gene symbol</b> | <b>Ensemble gene ID</b> | <b>Gene symbol</b> |
|-------------------------|--------------------|-------------------------|--------------------|-------------------------|--------------------|
| ENSG00000211893         | IGHG2              | ENSG00000133561         | GIMAP6             | ENSG00000084733         | RAB10              |
| ENSG00000010030         | ETV7               | ENSG00000149131         | SERPING1           | ENSG00000172543         | CTSW               |
| ENSG00000211659         | IGLV3-25           | ENSG00000128394         | APOBEC3F           | ENSG00000163823         | CCR1               |
| ENSG00000177409         | SAMD9L             | ENSG00000161929         | SCIMP              | ENSG00000156127         | BATF               |
| ENSG00000211592         | IGKC               | ENSG00000132465         | JCHAIN             | ENSG00000166278         | C2                 |
| ENSG00000211666         | IGLV2-14           | ENSG00000168016         | TRANK1             | ENSG00000197930         | ERO1A              |
| ENSG00000163565         | IFI16              | ENSG00000126351         | THRA               | ENSG00000182378         | PLCXD1             |
| ENSG00000069702         | TGFBR3             | ENSG00000171219         | CDC42BPG           | ENSG00000119686         | FLVCR2             |
| ENSG00000132109         | TRIM21             | ENSG00000187164         | SHTN1              | ENSG00000155506         | LARP1              |
| ENSG00000117226         | GBP3               | ENSG00000165506         | DNAAF2             | ENSG00000140450         | ARRDC4             |
| ENSG00000138755         | CXCL9              | ENSG00000023171         | GRAMD1B            | ENSG00000073737         | DHRS9              |
| ENSG00000173193         | PARP14             | ENSG00000185215         | TNFAIP2            | ENSG00000183458         | AC138932.1         |
| ENSG00000113368         | LMNB1              | ENSG00000124256         | ZBP1               | ENSG00000256043         | CTSO               |
| ENSG00000239855         | IGKV1-6            | ENSG00000196735         | HLA-DQA1           | ENSG00000079616         | KIF22              |
| ENSG00000111335         | OAS2               | ENSG00000140749         | IGSF6              | ENSG00000253882         | AC099548.2         |
| ENSG00000163563         | MNDA               | ENSG00000175550         | DRAP1              | ENSG00000109063         | MYH3               |
| ENSG00000162614         | NEXN               | ENSG00000163568         | AIM2               | ENSG00000091106         | NLRC4              |
| ENSG00000252010         | SCARNA5            | ENSG00000108691         | CCL2               | ENSG00000277443         | MARCKS             |
| ENSG00000096968         | JAK2               | ENSG00000104518         | GSDMD              | ENSG00000075568         | TMEM131            |
| ENSG00000261150         | EPPK1              | ENSG00000151693         | ASAP2              | ENSG00000174718         | KIAA1551           |
| ENSG00000205413         | SAMD9              | ENSG00000105967         | TFEC               | ENSG00000183621         | ZNF438             |
| ENSG00000055130         | CUL1               | ENSG00000283537         | AC073264.3         | ENSG00000074181         | NOTCH3             |
| ENSG00000025708         | TYMP               | ENSG00000153283         | CD96               | ENSG00000085978         | ATG16L1            |
| ENSG00000125347         | IRF1               | ENSG00000132963         | POMP               | ENSG00000058866         | DGKG               |
| ENSG00000198604         | BAZ1A              | ENSG00000122877         | EGR2               | ENSG00000085265         | FCN1               |
| ENSG00000158517         | NCF1               | ENSG00000152778         | IFIT5              | ENSG00000211689         | TRGC1              |
| ENSG00000185745         | IFIT1              | ENSG00000169136         | ATF5               | ENSG00000165355         | FBXO33             |
| ENSG00000128284         | APOL3              | ENSG00000166750         | SLFN5              | ENSG00000015285         | WAS                |
| ENSG00000239951         | IGKV3-20           | ENSG00000126838         | PZP                | ENSG00000250138         | AC139495.3         |
| ENSG00000211943         | IGHV3-15           | ENSG00000111181         | SLC6A12            | ENSG00000214872         | SMTNL1             |
| ENSG00000212232         | SNORD17            | ENSG00000139192         | TAPBPL             | ENSG00000198938         | MT-CO3             |
| ENSG00000211899         | IGHM               | ENSG00000125826         | RBCK1              | ENSG00000137752         | CASP1              |
| ENSG00000196664         | TLR7               | ENSG00000008710         | PKD1               | ENSG00000160888         | IER2               |
| ENSG00000115523         | GNLY               | ENSG00000151948         | GLT1D1             | ENSG00000112110         | MRPL18             |
| ENSG00000177989         | ODF3B              | ENSG00000164442         | CITED2             | ENSG00000167202         | TBC1D2B            |
| ENSG00000198959         | TGM2               | ENSG00000137959         | IFI44L             | ENSG00000179899         | PHC1P1             |
| ENSG00000182487         | NCF1B              | ENSG00000106565         | TMEM176B           | ENSG00000172086         | KRCC1              |
| ENSG00000171115         | GIMAP8             | ENSG00000277072         | STAG3L2            | ENSG00000197272         | IL27               |
| ENSG00000123609         | NMI                | ENSG00000073331         | ALPK1              | ENSG00000185130         | HIST1H2BL          |

|                 |          |                 |            |                 |            |
|-----------------|----------|-----------------|------------|-----------------|------------|
| ENSG00000165178 | NCF1C    | ENSG00000154451 | GBP5       | ENSG00000111269 | CREBL2     |
| ENSG00000146072 | TNFRSF21 | ENSG00000130787 | HIP1R      | ENSG00000204516 | MICB       |
| ENSG00000115415 | STAT1    | ENSG00000106605 | BLVRA      | ENSG00000249855 | EEF1A1P19  |
| ENSG00000135899 | SP110    | ENSG00000138660 | AP1AR      | ENSG00000137393 | RNF144B    |
| ENSG00000108387 | SEPTIN4  | ENSG00000002549 | LAP3       | ENSG00000248477 | AC139495.1 |
| ENSG00000170581 | STAT2    | ENSG00000115091 | ACTR3      | ENSG00000185507 | IRF7       |
| ENSG00000184730 | APOBR    | ENSG00000119922 | IFIT2      | ENSG00000153563 | CD8A       |
| ENSG00000135636 | DYSF     | ENSG00000221963 | APOL6      | ENSG00000171503 | ETFDH      |
| ENSG00000183091 | NEB      | ENSG0000013364  | MVP        | ENSG00000198252 | STYX       |
| ENSG00000137801 | THBS1    | ENSG00000278196 | IGLV2-8    | ENSG00000107651 | SEC23IP    |
| ENSG00000133106 | EPSTI1   | ENSG00000198682 | PAPSS2     | ENSG00000162894 | FCMR       |
| ENSG00000133313 | CNDP2    | ENSG00000169245 | CXCL10     | ENSG00000067369 | TP53BP1    |
| ENSG00000243466 | IGKV1-5  | ENSG00000115392 | FANCL      | ENSG00000250687 | AC146944.2 |
| ENSG00000174125 | TLR1     | ENSG00000118689 | FOXO3      | ENSG00000151490 | PTPRO      |
| ENSG00000132530 | XAF1     | ENSG00000166532 | RIMKLB     | ENSG00000100100 | PIK3IP1    |
| ENSG00000101017 | CD40     | ENSG00000265531 | FCGR1CP    | ENSG00000070190 | DAPP1      |
| ENSG00000253755 | IGHGP    | ENSG00000198087 | CD2AP      | ENSG00000157693 | TMEM268    |
| ENSG00000188282 | RUFY4    | ENSG00000284669 | AC092053.3 | ENSG00000135842 | FAM129A    |
| ENSG00000179094 | PER1     | ENSG00000026103 | FAS        | ENSG00000137312 | FLOT1      |
| ENSG00000272821 | U62317.2 | ENSG00000111331 | OAS3       | ENSG00000106780 | MEGF9      |
| ENSG00000179144 | GIMAP7   | ENSG00000138385 | SSB        | ENSG00000121671 | CRY2       |
| ENSG00000068079 | IFI35    | ENSG00000059378 | PARP12     | ENSG00000130348 | QRSL1      |
| ENSG00000135148 | TRAFD1   | ENSG00000187608 | ISG15      | ENSG00000107566 | ERLIN1     |
| ENSG00000116663 | FBXO6    | ENSG00000279602 | AC109326.1 | ENSG00000171051 | FPR1       |
| ENSG00000150907 | FOXO1    | ENSG00000112367 | FIG4       | ENSG00000123700 | KCNJ2      |
| ENSG00000178537 | SLC25A20 | ENSG00000165949 | IFI27      | ENSG00000158874 | APOA2      |
| ENSG00000198814 | GK       | ENSG00000185339 | TCN2       | ENSG00000170542 | SERPINB9   |
| ENSG00000145287 | PLAC8    | ENSG00000027075 | PRKCH      | ENSG00000156587 | UBE2L6     |
| ENSG00000031081 | ARHGAP31 | ENSG00000093072 | ADA2       | ENSG00000273897 | AC211476.3 |
| ENSG00000133574 | GIMAP4   | ENSG00000158714 | SLAMF8     | ENSG00000112096 | SOD2       |
| ENSG00000134755 | DSC2     | ENSG00000085449 | WDFY1      | ENSG00000108055 | SMC3       |
| ENSG00000028116 | VRK2     | ENSG00000205583 | STAG3L1    | ENSG00000092531 | SNAP23     |
| ENSG00000198821 | CD247    | ENSG00000185950 | IRS2       | ENSG00000163220 | S100A9     |
| ENSG00000132274 | TRIM22   | ENSG00000121966 | CXCR4      | ENSG00000171316 | CHD7       |
| ENSG00000054654 | SYNE2    | ENSG00000211685 | IGLC7      | ENSG00000173369 | C1QB       |
| ENSG00000041357 | PSMA4    | ENSG00000172183 | ISG20      | ENSG00000030582 | GRN        |
| ENSG00000109906 | ZBTB16   | ENSG00000127954 | STEAP4     | ENSG00000163739 | CXCL1      |
| ENSG00000020577 | SAMD4A   | ENSG00000196954 | CASP4      | ENSG00000157557 | ETS2       |
| ENSG00000185499 | MUC1     | ENSG00000065911 | MTHFD2     | ENSG00000103657 | HERC1      |
| ENSG00000157514 | TSC22D3  | ENSG00000107554 | DNMBP      | ENSG00000159228 | CBR1       |
| ENSG00000140464 | PML      | ENSG00000131979 | GCH1       | ENSG00000239521 | CASTOR3    |

|                 |            |                 |            |                 |            |
|-----------------|------------|-----------------|------------|-----------------|------------|
| ENSG00000082074 | FYB1       | ENSG00000117054 | ACADM      | ENSG00000110721 | CHKA       |
| ENSG00000114127 | XRN1       | ENSG00000185404 | SP140L     | ENSG00000168685 | IL7R       |
| ENSG00000013374 | NUB1       | ENSG00000137965 | IFI44      | ENSG00000120217 | CD274      |
| ENSG00000145349 | CAMK2D     | ENSG00000204397 | CARD16     | ENSG00000112419 | PHACTR2    |
| ENSG00000163840 | DTX3L      | ENSG00000150337 | FCGR1A     | ENSG00000151725 | CENPU      |
| ENSG00000211966 | IGHV5-51   | ENSG00000111452 | ADGRD1     | ENSG00000258581 | AL157871.3 |
| ENSG00000200087 | SNORA73B   | ENSG00000239713 | APOBEC3G   | ENSG00000162654 | GBP4       |
| ENSG00000152766 | ANKRD22    | ENSG00000138246 | DNAJC13    | ENSG00000171204 | TMEM126B   |
| ENSG00000121807 | CCR2       | ENSG00000173110 | HSPA6      | ENSG00000104805 | NUCB1      |
| ENSG00000060491 | OGFR       | ENSG00000130303 | BST2       | ENSG00000047634 | SCML1      |
| ENSG00000135218 | CD36       | ENSG00000129515 | SNX6       | ENSG00000115594 | IL1R1      |
| ENSG00000160932 | LY6E       | ENSG00000227827 | AC138969.1 | ENSG00000068120 | COASY      |
| ENSG00000100342 | APOL1      | ENSG00000205746 | AC126755.1 | ENSG00000064607 | SUGP2      |
| ENSG00000019169 | MARCO      | ENSG00000182511 | FES        | ENSG00000163644 | PPM1K      |
| ENSG00000108679 | LGALS3BP   | ENSG00000157601 | MX1        | ENSG00000130813 | C19orf66   |
| ENSG00000188404 | SELL       | ENSG00000134574 | DDB2       | ENSG00000136874 | STX17      |
| ENSG00000089127 | OAS1       | ENSG00000139725 | RHOF       | ENSG00000198771 | RCSD1      |
| ENSG00000076555 | ACACB      | ENSG00000249437 | NAIP       | ENSG00000198886 | MT-ND4     |
| ENSG00000229859 | PGA3       | ENSG00000122694 | GLIPR2     | ENSG00000088992 | TESC       |
| ENSG00000263069 | AC124319.2 | ENSG00000146070 | PLA2G7     | ENSG00000155097 | ATP6V1C1   |
| ENSG00000101916 | TLR8       | ENSG00000229183 | PGA4       | ENSG00000197405 | C5AR1      |
| ENSG00000115590 | IL1R2      | ENSG00000179933 | C14orf119  | ENSG00000188559 | RALGAPA2   |
| ENSG00000204267 | TAP2       | ENSG00000206503 | HLA-A      | ENSG00000225684 | FAM225B    |
| ENSG00000148429 | USP6NL     | ENSG00000175899 | A2M        | ENSG00000213512 | GBP7       |
| ENSG00000121858 | TNFSF10    | ENSG00000085840 | ORC1       | ENSG00000109046 | WSB1       |
| ENSG00000145113 | MUC4       | ENSG00000137767 | SQOR       | ENSG00000204525 | HLA-C      |
| ENSG00000092010 | PSME1      | ENSG00000026950 | BTN3A1     | ENSG00000137193 | PIM1       |
| ENSG00000155307 | SAMSN1     | ENSG00000139687 | RB1        | ENSG00000231528 | FAM225A    |
| ENSG00000242371 | IGKV1-39   | ENSG00000178146 | AL672207.1 | ENSG00000196743 | GM2A       |
| ENSG00000140853 | NLRC5      | ENSG00000122035 | RASL11A    | ENSG00000142089 | IFITM3     |
| ENSG00000225492 | GBP1P1     | ENSG00000140750 | ARHGAP17   | ENSG00000100883 | SRP54      |
| ENSG00000151014 | NOCT       | ENSG00000113448 | PDE4D      | ENSG00000136156 | ITM2B      |
| ENSG00000267519 | AC020916.1 | ENSG00000081041 | CXCL2      | ENSG00000213928 | IRF9       |
| ENSG00000234518 | PTGES3P1   | ENSG00000211898 | IGHD       | ENSG00000115904 | SOS1       |
| ENSG00000134326 | CMPK2      | ENSG00000116337 | AMPD2      | ENSG00000236567 | TCF3P1     |
| ENSG00000211648 | IGLV1-47   | ENSG00000211677 | IGLC2      | ENSG00000185187 | SIGIRR     |
| ENSG00000107201 | DDX58      | ENSG00000123908 | AGO2       | ENSG00000130724 | CHMP2A     |
| ENSG00000225131 | PSME2P2    | ENSG00000111859 | NEDD9      | ENSG00000136048 | DRAM1      |
| ENSG00000138496 | PARP9      | ENSG00000178685 | PARP10     | ENSG00000165312 | OTUD1      |
| ENSG00000240445 | FOXO3B     | ENSG00000165806 | CASP7      | ENSG00000115232 | ITGA4      |
| ENSG00000151012 | SLC7A11    | ENSG00000101347 | SAMHD1     | ENSG00000166033 | HTRA1      |

|                 |            |                 |            |                 |            |
|-----------------|------------|-----------------|------------|-----------------|------------|
| ENSG00000166801 | FAM111A    | ENSG00000204592 | HLA-E      | ENSG00000205336 | ADGRG1     |
| ENSG00000086065 | CHMP5      | ENSG00000164715 | LMTK2      | ENSG00000143554 | SLC27A3    |
| ENSG00000023902 | PLEKHO1    | ENSG00000254681 | PKD1P5     | ENSG00000096996 | IL12RB1    |
| ENSG00000100220 | RTCB       | ENSG00000111752 | PHC1       | ENSG00000143226 | FCGR2A     |
| ENSG00000168310 | IRF2       | ENSG00000185482 | STAC3      | ENSG00000164855 | TMEM184A   |
| ENSG00000251546 | IGKV1D-39  | ENSG00000181381 | DDX60L     | ENSG00000211640 | IGLV6-57   |
| ENSG00000175866 | BAIAP2     | ENSG00000182923 | CEP63      | ENSG00000264229 | RNU4ATAC   |
| ENSG00000171049 | FPR2       | ENSG00000137364 | TPMT       | ENSG00000105939 | ZC3HAV1    |
| ENSG00000167851 | CD300A     | ENSG00000179978 | AC140134.1 | ENSG00000196873 | CBWD3      |
| ENSG00000165168 | CYBB       | ENSG00000100911 | PSME2      | ENSG00000143376 | SNX27      |
| ENSG00000154479 | CCDC173    | ENSG00000174353 | STAG3L3    | ENSG00000258521 | AL157871.2 |
| ENSG00000204642 | HLA-F      | ENSG00000211897 | IGHG3      | ENSG00000142599 | RERE       |
| ENSG00000182541 | LIMK2      | ENSG00000243156 | MICAL3     | ENSG00000204577 | LILRB3     |
| ENSG00000152229 | PSTPIP2    | ENSG00000168394 | TAP1       | ENSG00000240065 | PSMB9      |
| ENSG00000211653 | IGLV1-40   | ENSG00000132122 | SPATA6     | ENSG00000166710 | B2M        |
| ENSG00000155657 | TTN        | ENSG00000103642 | LACTB      | ENSG00000212195 | RF00012    |
| ENSG00000115267 | IFIH1      | ENSG00000102081 | FMR1       | ENSG00000131196 | NFATC1     |
| ENSG00000111801 | BTN3A3     | ENSG00000070961 | ATP2B1     | ENSG00000168209 | DDIT4      |
| ENSG00000204264 | PSMB8      | ENSG00000108424 | KPNB1      | ENSG00000244257 | PKD1P1     |
| ENSG00000119917 | IFIT3      | ENSG00000256713 | PGA5       | ENSG00000115525 | ST3GAL5    |
| ENSG00000211655 | IGLV1-36   | ENSG00000162645 | GBP2       | ENSG00000198237 | AC131392.1 |
| ENSG00000141232 | TOB1       | ENSG00000134954 | ETS1       | ENSG00000166527 | CLEC4D     |
| ENSG00000144848 | ATG3       | ENSG00000003400 | CASP10     | ENSG00000138646 | HERC5      |
| ENSG00000267293 | AC012569.1 | ENSG00000166889 | PATL1      | ENSG00000166068 | SPRED1     |
| ENSG00000172785 | CBWD1      | ENSG00000186470 | BTN3A2     | ENSG00000173221 | GLRX       |
| ENSG00000117228 | GBP1       | ENSG00000172936 | MYD88      | ENSG00000134001 | EIF2S1     |
| ENSG00000198851 | CD3E       | ENSG00000179388 | EGR3       | ENSG00000135828 | RNASEL     |
| ENSG00000180644 | PRF1       | ENSG00000198019 | FCGR1B     | ENSG00000185697 | MYBL1      |
| ENSG00000130589 | HELZ2      | ENSG00000100918 | REC8       | ENSG00000134061 | CD180      |
| ENSG00000105402 | NAPA       | ENSG00000123200 | ZC3H13     | ENSG00000110852 | CLEC2B     |
| ENSG00000136630 | HLX        | ENSG00000146433 | TMEM181    | ENSG00000224041 | IGKV3D-15  |
| ENSG00000188906 | LRRK2      | ENSG00000136682 | CBWD2      | ENSG00000169994 | MYO7B      |
| ENSG00000120738 | EGR1       | ENSG00000034053 | APBA2      | ENSG00000092964 | DPYSL2     |
| ENSG00000160710 | ADAR       | ENSG00000064932 | SBNO2      | ENSG00000184432 | COPB2      |
| ENSG00000102524 | TNFSF13B   | ENSG00000104325 | DECR1      | ENSG00000049759 | NEDD4L     |
| ENSG00000185477 | GPRIN3     | ENSG00000108771 | DHX58      | ENSG00000211625 | IGKV3D-20  |
| ENSG00000113369 | ARRDC3     | ENSG00000153029 | MR1        | ENSG00000129450 | SIGLEC9    |
| ENSG00000179583 | CIITA      | ENSG00000238741 | SCARNA7    | ENSG00000105875 | WDR91      |
| ENSG00000004468 | CD38       | ENSG00000124181 | PLCG1      | ENSG00000132694 | ARHGEF11   |
| ENSG00000086300 | SNX10      | ENSG00000146535 | GNA12      | ENSG00000198712 | MT-CO2     |
| ENSG00000079263 | SP140      | ENSG00000155363 | MOV10      | ENSG00000205220 | PSMB10     |

|                 |           |                 |            |                 |         |
|-----------------|-----------|-----------------|------------|-----------------|---------|
| ENSG00000170873 | MTSS1     | ENSG00000184979 | USP18      | ENSG00000232882 | PHKA1P1 |
| ENSG00000204261 | PSMB8-AS1 | ENSG00000125363 | AMELX      | ENSG00000270379 | HEATR9  |
| ENSG00000197536 | C5orf56   | ENSG00000186818 | LILRB4     | ENSG00000134470 | IL15RA  |
| ENSG00000107742 | SPOCK2    | ENSG00000251634 | AC145138.1 | ENSG00000162437 | RAVER2  |
| ENSG00000112079 | STK38     | ENSG00000229023 | AC067945.1 | ENSG00000108819 | PPP1R9B |
| ENSG00000124357 | NAGK      | ENSG00000174749 | FAM241A    |                 |         |
| ENSG00000165029 | ABCA1     | ENSG00000152223 | EPG5       |                 |         |
| ENSG00000130340 | SNX9      | ENSG00000150540 | HNMT       |                 |         |
| ENSG00000121210 | TMEM131L  | ENSG0000022556  | NLRP2      |                 |         |

| <b>Supplementary Table 2. List of significant DEGs in the Child acute malaria cohort (FDR&lt;0.05)</b> |                    |                         |                    |                         |                    |
|--------------------------------------------------------------------------------------------------------|--------------------|-------------------------|--------------------|-------------------------|--------------------|
| <b>Ensemble gene ID</b>                                                                                | <b>Gene Symbol</b> | <b>Ensemble gene ID</b> | <b>Gene Symbol</b> | <b>Ensemble gene ID</b> | <b>Gene Symbol</b> |
| ENSG00000138119                                                                                        | MYOF               | ENSG00000097033         | SH3GLB1            | ENSG00000103569         | AQP9               |
| ENSG00000135424                                                                                        | ITGA7              | ENSG00000168329         | CX3CR1             | ENSG00000162433         | AK4                |
| ENSG00000169994                                                                                        | MYO7B              | ENSG00000167601         | AXL                | ENSG00000180644         | PRF1               |
| ENSG00000275395                                                                                        | FCGBP              | ENSG00000166578         | IQCD               | ENSG00000137500         | CCDC90B            |
| ENSG00000122591                                                                                        | FAM126A            | ENSG00000104381         | GDAP1              | ENSG00000136754         | ABI1               |
| ENSG00000197530                                                                                        | MIB2               | ENSG00000133789         | SWAP70             | ENSG00000197540         | GZMM               |
| ENSG00000197993                                                                                        | KEL                | ENSG00000244734         | HBB                | ENSG00000113263         | ITK                |
| ENSG00000125144                                                                                        | MT1G               | ENSG00000088387         | DOCK9              | ENSG00000280138         | AC027290.2         |
| ENSG00000087237                                                                                        | CETP               | ENSG00000260231         | KDM7A-DT           | ENSG00000205018         | AC092384.1         |
| ENSG00000120885                                                                                        | CLU                | ENSG00000142173         | COL6A2             | ENSG00000224712         | NPIPA3             |
| ENSG00000211696                                                                                        | TRGV8              | ENSG00000212195         | RF00012            | ENSG00000078589         | P2RY10             |
| ENSG00000100427                                                                                        | MLC1               | ENSG00000135677         | GNS                | ENSG00000280407         | AC132872.4         |
| ENSG00000198719                                                                                        | DLL1               | ENSG00000260691         | ANKRD20A1          | ENSG00000185499         | MUC1               |
| ENSG00000137767                                                                                        | SQOR               | ENSG00000134480         | CCNH               | ENSG00000013364         | MVP                |
| ENSG00000101695                                                                                        | RNF125             | ENSG00000129255         | MPDU1              | ENSG00000267749         | AC092068.3         |
| ENSG00000134575                                                                                        | ACP2               | ENSG00000196839         | ADA                | ENSG00000203804         | ADAMTSL4-AS1       |
| ENSG00000183914                                                                                        | DNAH2              | ENSG00000126226         | PCID2              | ENSG00000174125         | TLR1               |
| ENSG00000006025                                                                                        | OSBPL7             | ENSG00000166278         | C2                 | ENSG00000277610         | RNVU1-4            |
| ENSG00000169413                                                                                        | RNASE6             | ENSG00000159640         | ACE                | ENSG00000135473         | PAN2               |
| ENSG00000101412                                                                                        | E2F1               | ENSG00000129484         | PARP2              | ENSG00000157168         | NRG1               |
| ENSG00000169715                                                                                        | MT1E               | ENSG00000162804         | SNED1              | ENSG00000160856         | FCRL3              |
| ENSG00000166428                                                                                        | PLD4               | ENSG00000160285         | LSS                | ENSG00000092841         | MYL6               |
| ENSG00000135749                                                                                        | PCNX2              | ENSG00000088179         | PTPN4              | ENSG00000124733         | MEA1               |
| ENSG00000105220                                                                                        | GPI                | ENSG00000086288         | NME8               | ENSG00000196092         | PAX5               |
| ENSG00000166446                                                                                        | CDYL2              | ENSG00000117308         | GALE               | ENSG00000113108         | APBB3              |
| ENSG00000143603                                                                                        | KCNN3              | ENSG00000273338         | AC103591.3         | ENSG00000184983         | NDUFA6             |
| ENSG00000088280                                                                                        | ASAP3              | ENSG00000136826         | KLF4               | ENSG00000169504         | CLIC4              |
| ENSG00000026751                                                                                        | SLAMF7             | ENSG00000148154         | UGCG               | ENSG00000206530         | CFAP44             |

|                 |            |                 |          |                 |            |
|-----------------|------------|-----------------|----------|-----------------|------------|
| ENSG00000173372 | C1QA       | ENSG00000204136 | GGTA1P   | ENSG00000170074 | FAM153A    |
| ENSG00000158481 | CD1C       | ENSG00000186815 | TPCN1    | ENSG00000204406 | MBD5       |
| ENSG00000007968 | E2F2       | ENSG00000175048 | ZDHHC14  | ENSG00000159128 | IFNGR2     |
| ENSG00000160307 | S100B      | ENSG00000119541 | VPS4B    | ENSG00000106789 | CORO2A     |
| ENSG00000079482 | OPHN1      | ENSG00000167613 | LAIR1    | ENSG00000087589 | CASS4      |
| ENSG00000267519 | AC020916.1 | ENSG00000081923 | ATP8B1   | ENSG00000133316 | WDR74      |
| ENSG00000125746 | EML2       | ENSG00000128923 | MINDY2   | ENSG00000103769 | RAB11A     |
| ENSG00000146386 | ABRACL     | ENSG00000205809 | KLRC2    | ENSG00000011201 | ANOS1      |
| ENSG00000213934 | HBG1       | ENSG00000163735 | CXCL5    | ENSG00000185897 | FFAR3      |
| ENSG00000164733 | CTSB       | ENSG00000105185 | PDCD5    | ENSG00000157593 | SLC35B2    |
| ENSG00000110958 | PTGES3     | ENSG00000167106 | FAM102A  | ENSG00000101189 | MRGBP      |
| ENSG00000109062 | SLC9A3R1   | ENSG00000108405 | P2RX1    | ENSG00000080031 | PTPRH      |
| ENSG00000050393 | MCUR1      | ENSG00000179542 | SLITRK4  | ENSG00000138613 | APH1B      |
| ENSG00000149177 | PTPRJ      | ENSG00000109684 | CLNK     | ENSG00000151208 | DLG5       |
| ENSG00000137193 | PIM1       | ENSG00000174099 | MSRB3    | ENSG00000106733 | NMRK1      |
| ENSG00000152766 | ANKRD22    | ENSG00000135404 | CD63     | ENSG00000099985 | OSM        |
| ENSG00000158869 | FCER1G     | ENSG00000274210 | RF00003  | ENSG00000137185 | ZSCAN9     |
| ENSG00000275538 | RNVU1-19   | ENSG00000086666 | ZFAND6   | ENSG00000140398 | NEIL1      |
| ENSG00000170439 | METTL7B    | ENSG00000134545 | KLRC1    | ENSG00000176261 | ZBTB8OS    |
| ENSG00000230989 | HSBP1      | ENSG00000001167 | NFYA     | ENSG00000260229 | PPIAP51    |
| ENSG00000196776 | CD47       | ENSG00000163520 | FBLN2    | ENSG00000128159 | TUBGCP6    |
| ENSG00000143653 | SCCPDH     | ENSG00000158186 | MRAS     | ENSG00000127152 | BCL11B     |
| ENSG00000130600 | H19        | ENSG00000100307 | CBX7     | ENSG00000204815 | TTC25      |
| ENSG00000175455 | CCDC14     | ENSG00000155366 | RHOC     | ENSG00000196796 | NPIP10P    |
| ENSG00000234369 | TATDN1P1   | ENSG00000090447 | TFAP4    | ENSG00000185163 | DDX51      |
| ENSG00000182162 | P2RY8      | ENSG00000117450 | PRDX1    | ENSG00000005249 | PRKAR2B    |
| ENSG00000101856 | PGRMC1     | ENSG00000131174 | COX7B    | ENSG00000227191 | TRGC2      |
| ENSG00000162591 | MEGF6      | ENSG00000105509 | HAS1     | ENSG00000284669 | AC092053.3 |
| ENSG00000173369 | C1QB       | ENSG00000151136 | BTBD11   | ENSG00000117425 | PTCH2      |
| ENSG00000073605 | GSDMB      | ENSG00000167553 | TUBA1C   | ENSG00000136732 | GYPC       |
| ENSG00000030066 | NUP160     | ENSG00000163568 | AIM2     | ENSG00000223901 | AP001469.1 |
| ENSG00000150687 | PRSS23     | ENSG00000103064 | SLC7A6   | ENSG00000125257 | ABCC4      |
| ENSG00000075624 | ACTB       | ENSG00000136167 | LCP1     | ENSG00000177098 | SCN4B      |
| ENSG00000151623 | NR3C2      | ENSG00000111229 | ARPC3    | ENSG00000156886 | ITGAD      |
| ENSG00000168026 | TTC21A     | ENSG00000140563 | MCTP2    | ENSG00000186174 | BCL9L      |
| ENSG00000265531 | FCGR1CP    | ENSG00000157045 | NTAN1    | ENSG00000180611 | MB21D2     |
| ENSG00000034053 | APBA2      | ENSG00000158488 | CD1E     | ENSG00000139537 | CCDC65     |
| ENSG00000109065 | NAT9       | ENSG00000147133 | TAF1     | ENSG00000167600 | CYP2S1     |
| ENSG00000138600 | SPPL2A     | ENSG00000123416 | TUBA1B   | ENSG00000112290 | WASF1      |
| ENSG00000113070 | HBEGF      | ENSG00000104177 | MYEF2    | ENSG00000141698 | NT5C3B     |
| ENSG00000104814 | MAP4K1     | ENSG00000142512 | SIGLEC10 | ENSG00000003056 | M6PR       |

|                 |            |                 |            |                 |            |
|-----------------|------------|-----------------|------------|-----------------|------------|
| ENSG00000158470 | B4GALT5    | ENSG00000147400 | CETN2      | ENSG00000171502 | COL24A1    |
| ENSG00000147459 | DOCK5      | ENSG00000272419 | LINC01145  | ENSG00000198892 | SHISA4     |
| ENSG00000164292 | RHOBTB3    | ENSG00000144218 | AFF3       | ENSG00000196154 | S100A4     |
| ENSG00000075142 | SRI        | ENSG00000155657 | TTN        | ENSG00000240563 | L1TD1      |
| ENSG00000138821 | SLC39A8    | ENSG00000136153 | LMO7       | ENSG00000183148 | ANKRD20A2  |
| ENSG00000116962 | NID1       | ENSG00000091592 | NLRP1      | ENSG00000112695 | COX7A2     |
| ENSG00000114209 | PDCD10     | ENSG00000214544 | GTF2IRD2P1 | ENSG00000196169 | KIF19      |
| ENSG00000123240 | OPTN       | ENSG00000168246 | UBTD2      | ENSG00000283674 | AC068587.4 |
| ENSG00000214967 | NPIPA7     | ENSG00000127526 | SLC35E1    | ENSG00000176658 | MYO1D      |
| ENSG00000159189 | C1QC       | ENSG00000133687 | TMTC1      | ENSG00000188735 | TMEM120B   |
| ENSG00000274102 | OR4M2      | ENSG00000162512 | SDC3       | ENSG00000188599 | NPIPP1     |
| ENSG00000109066 | TMEM104    | ENSG00000027075 | PRKCH      | ENSG00000188886 | ASTL       |
| ENSG00000165914 | TTC7B      | ENSG00000139970 | RTN1       | ENSG00000188185 | LINC00265  |
| ENSG00000163687 | DNASE1L3   | ENSG00000113552 | GNPDA1     | ENSG00000120137 | PANK3      |
| ENSG00000168899 | VAMP5      | ENSG00000123609 | NMI        | ENSG00000164919 | COX6C      |
| ENSG00000185697 | MYBL1      | ENSG00000189043 | NDUFA4     | ENSG00000137714 | FDX1       |
| ENSG00000070814 | TCOF1      | ENSG00000223705 | NSUN5P1    | ENSG00000102316 | MAGED2     |
| ENSG00000177556 | ATOX1      | ENSG00000165685 | TMEM52B    | ENSG00000219928 | AL161787.1 |
| ENSG00000198019 | FCGR1B     | ENSG00000135596 | MICAL1     | ENSG00000025434 | NR1H3      |
| ENSG00000198156 | NPIPB6     | ENSG00000168702 | LRP1B      | ENSG00000180720 | CHRM4      |
| ENSG00000150337 | FCGR1A     | ENSG00000168763 | CNNM3      | ENSG00000064651 | SLC12A2    |
| ENSG00000161509 | GRIN2C     | ENSG00000134061 | CD180      | ENSG00000225492 | GBP1P1     |
| ENSG00000143633 | C1orf131   | ENSG00000184613 | NELL2      | ENSG00000155849 | ELMO1      |
| ENSG00000077549 | CAPZB      | ENSG00000276216 | AC245014.3 | ENSG00000244509 | APOBEC3C   |
| ENSG00000116133 | DHCR24     | ENSG00000196562 | SULF2      | ENSG00000145730 | PAM        |
| ENSG00000122565 | CBX3       | ENSG00000105639 | JAK3       | ENSG00000164741 | DLC1       |
| ENSG00000167552 | TUBA1A     | ENSG00000137726 | FXYP6      | ENSG00000264229 | RNU4ATAC   |
| ENSG00000183762 | KREMEN1    | ENSG00000165795 | NDRG2      | ENSG00000172594 | SMPDL3A    |
| ENSG00000160213 | CSTB       | ENSG00000196230 | TUBB       | ENSG00000029153 | ARNTL2     |
| ENSG00000108950 | FAM20A     | ENSG00000139718 | SETD1B     | ENSG00000206828 | RF00003    |
| ENSG00000007402 | CACNA2D2   | ENSG00000157445 | CACNA2D3   | ENSG00000197785 | ATAD3A     |
| ENSG00000167280 | ENGASE     | ENSG00000048028 | USP28      | ENSG00000197860 | SGTB       |
| ENSG00000118922 | KLF12      | ENSG00000206596 | RNU1-27P   | ENSG00000169495 | HTRA4      |
| ENSG00000183889 | PKD1P1     | ENSG00000153310 | FAM49B     | ENSG00000163534 | FCRL1      |
| ENSG00000233024 | AC126755.2 | ENSG00000226608 | FTLP3      | ENSG00000108823 | SGCA       |
| ENSG00000142089 | IFITM3     | ENSG00000183426 | NPIPA1     | ENSG00000092929 | UNC13D     |
| ENSG00000196993 | NPIPB9     | ENSG00000110455 | ACCS       | ENSG00000198833 | UBE2J1     |
| ENSG00000145868 | FBXO38     | ENSG00000116489 | CAPZA1     | ENSG00000101187 | SLCO4A1    |
| ENSG00000106341 | PPP1R17    | ENSG00000173915 | ATP5MD     | ENSG00000213918 | DNASE1     |
| ENSG00000160111 | CPAMD8     | ENSG00000132963 | POMP       | ENSG00000110719 | TCIRG1     |
| ENSG00000165731 | RET        | ENSG00000172673 | THEMIS     | ENSG00000198829 | SUCNR1     |

|                 |            |                 |            |                 |            |
|-----------------|------------|-----------------|------------|-----------------|------------|
| ENSG00000198821 | CD247      | ENSG00000164342 | TLR3       | ENSG00000114738 | MAPKAPK3   |
| ENSG00000105887 | MTPN       | ENSG00000188042 | ARL4C      | ENSG00000174177 | CTU2       |
| ENSG00000188158 | NHS        | ENSG00000101868 | POLA1      | ENSG00000100100 | PIK3IP1    |
| ENSG00000254893 | AC113404.3 | ENSG00000106948 | AKNA       | ENSG00000189014 | SHLD2P3    |
| ENSG00000077585 | GPR137B    | ENSG00000104852 | SNRNP70    | ENSG00000204160 | ZDHHC18    |
| ENSG00000162129 | CLPB       | ENSG00000164111 | ANXA5      | ENSG00000123728 | RAP2C      |
| ENSG00000007312 | CD79B      | ENSG00000163743 | RCHY1      | ENSG00000141337 | ARSG       |
| ENSG00000058056 | USP13      | ENSG00000211829 | TRDC       | ENSG00000131018 | SYNE1      |
| ENSG00000115568 | ZNF142     | ENSG00000087086 | FTL        | ENSG00000197057 | DTHD1      |
| ENSG00000078401 | EDN1       | ENSG00000142166 | IFNAR1     | ENSG00000258820 | AF111167.1 |
| ENSG00000104972 | LILRB1     | ENSG00000026103 | FAS        | ENSG00000149527 | PLCH2      |
| ENSG00000181143 | MUC16      | ENSG00000180739 | S1PR5      | ENSG00000074966 | TXK        |
| ENSG00000162645 | GBP2       | ENSG00000119922 | IFIT2      | ENSG00000144655 | CSRNP1     |
| ENSG00000177191 | B3GNT8     | ENSG00000168016 | TRANK1     | ENSG00000156273 | BACH1      |
| ENSG00000025039 | RRAGD      | ENSG00000206588 | RNU1-28P   | ENSG00000170365 | SMAD1      |
| ENSG00000272391 | POM121C    | ENSG00000198792 | TMEM184B   | ENSG00000139211 | AMIGO2     |
| ENSG00000123131 | PRDX4      | ENSG00000163378 | EOGT       | ENSG00000163577 | EIF5A2     |
| ENSG00000173068 | BNC2       | ENSG00000119698 | PPP4R4     | ENSG00000171916 | LGALS9C    |
| ENSG00000118680 | MYL12B     | ENSG00000054392 | HHAT       | ENSG00000183793 | NPIPA5     |
| ENSG00000065485 | PDIA5      | ENSG00000156475 | PPP2R2B    | ENSG00000205542 | TMSB4X     |
| ENSG00000108773 | KAT2A      | ENSG00000200169 | RNU5D-1    | ENSG00000174405 | LIG4       |
| ENSG00000164674 | SYTL3      | ENSG00000062598 | ELMO2      | ENSG00000160190 | SLC37A1    |
| ENSG00000008869 | HEATR5B    | ENSG00000256745 | AP002784.2 | ENSG00000186818 | LILRB4     |
| ENSG00000135363 | LMO2       | ENSG00000160014 | CALM3      | ENSG00000204472 | AIF1       |
| ENSG00000223609 | HBD        | ENSG00000133105 | RXFP2      | ENSG00000270022 | Z93241.1   |
| ENSG00000105246 | EBI3       | ENSG00000174231 | PRPF8      | ENSG00000164099 | PRSS12     |
| ENSG00000166394 | CYB5R2     | ENSG00000090565 | RAB11FIP3  | ENSG00000153107 | ANAPC1     |
| ENSG00000139182 | CLSTN3     | ENSG00000117228 | GBP1       | ENSG00000161057 | PSMC2      |
| ENSG00000124406 | ATP8A1     | ENSG00000143126 | CELSR2     | ENSG00000108582 | CPD        |
| ENSG00000127314 | RAP1B      | ENSG00000179639 | FCER1A     | ENSG00000111237 | VPS29      |
| ENSG00000124466 | LYPD3      | ENSG00000162413 | KLHL21     | ENSG00000176871 | WSB2       |
| ENSG00000125740 | FOSB       | ENSG00000207205 | RNVU1-15   | ENSG00000109390 | NDUFC1     |
| ENSG00000171163 | ZNF692     | ENSG00000174428 | GTF2IRD2B  | ENSG00000128944 | KNSTRN     |
| ENSG00000143776 | CDC42BPA   | ENSG00000205810 | KLRC3      | ENSG00000091106 | NLRC4      |
| ENSG00000198910 | L1CAM      | ENSG00000178175 | ZNF366     | ENSG00000215845 | TSTD1      |
| ENSG00000080298 | RFX3       | ENSG00000214194 | SMIM30     | ENSG00000009694 | TENM1      |
| ENSG00000152454 | ZNF256     | ENSG00000152672 | CLEC4F     | ENSG00000135900 | MRPL44     |
| ENSG00000174775 | HRAS       | ENSG00000211751 | TRBC1      | ENSG00000187653 | TMSB4XP8   |
| ENSG00000154265 | ABCA5      | ENSG00000140718 | FTO        | ENSG00000114446 | IFT57      |
| ENSG00000170385 | SLC30A1    | ENSG00000135838 | NPL        | ENSG00000196586 | MYO6       |
| ENSG00000182557 | SPNS3      | ENSG00000168229 | PTGDR      | ENSG00000181722 | ZBTB20     |

|                 |          |                 |            |                 |          |
|-----------------|----------|-----------------|------------|-----------------|----------|
| ENSG00000147155 | EBP      | ENSG00000125898 | FAM110A    | ENSG00000276966 | HIST1H4E |
| ENSG00000111348 | ARHGDIB  | ENSG00000148484 | RSU1       | ENSG00000246705 | H2AFJ    |
| ENSG00000115523 | GNLY     | ENSG00000102794 | ACOD1      | ENSG00000265666 | RARA-AS1 |
| ENSG00000172757 | CFL1     | ENSG00000182866 | LCK        | ENSG00000069702 | TGFBR3   |
| ENSG00000178921 | PFAS     | ENSG00000104687 | GSR        | ENSG00000065911 | MTHFD2   |
| ENSG00000115652 | UXS1     | ENSG00000119013 | NDUFB3     | ENSG00000143353 | LYPLAL1  |
| ENSG00000167315 | ACAA2    | ENSG00000198851 | CD3E       | ENSG00000108515 | ENO3     |
| ENSG00000166398 | KIAA0355 | ENSG00000279602 | AC109326.1 | ENSG00000160654 | CD3G     |
| ENSG00000143771 | CNIH4    | ENSG00000100985 | MMP9       | ENSG00000100450 | GZMH     |
| ENSG00000136111 | TBC1D4   | ENSG00000133247 | KMT5C      | ENSG00000077463 | SIRT6    |
| ENSG00000138002 | IFT172   | ENSG00000254852 | NPIPA2     | ENSG00000157388 | CACNA1D  |
| ENSG00000213281 | NRAS     | ENSG00000100266 | PACSIN2    | ENSG00000162704 | ARPC5    |
| ENSG00000197948 | FCHSD1   | ENSG00000131165 | CHMP1A     | ENSG00000168884 | TNIP2    |
| ENSG00000189350 | TOGARAM2 | ENSG00000128340 | RAC2       |                 |          |
| ENSG00000152270 | PDE3B    |                 |            |                 |          |

| <b>Supplementary Table 3. List of significant DEGs in the Adult acute malaria cohort (FDR&lt;0.05)</b> |                    |                         |                    |                         |                    |
|--------------------------------------------------------------------------------------------------------|--------------------|-------------------------|--------------------|-------------------------|--------------------|
| <b>Ensemble gene ID</b>                                                                                | <b>Gene symbol</b> | <b>Ensemble gene ID</b> | <b>Gene symbol</b> | <b>Ensemble gene ID</b> | <b>Gene symbol</b> |
| ENSG00000154258                                                                                        | ABCA9              | ENSG00000166501         | PRKCB              | ENSG00000113749         | HRH2               |
| ENSG00000133067                                                                                        | LGR6               | ENSG00000166387         | PPFIBP2            | ENSG00000196839         | ADA                |
| ENSG00000102962                                                                                        | CCL22              | ENSG00000127507         | ADGRE2             | ENSG00000145416         | MARCH1             |
| ENSG00000164483                                                                                        | SAMD3              | ENSG00000116337         | AMPD2              | ENSG00000139194         | RBP5               |
| ENSG00000114204                                                                                        | SERPINI2           | ENSG00000172932         | ANKRD13D           | ENSG00000126266         | FFAR1              |
| ENSG00000278528                                                                                        | AC145285.7         | ENSG00000135596         | MICAL1             | ENSG00000166446         | CDYL2              |
| ENSG00000120337                                                                                        | TNFSF18            | ENSG00000179241         | LDLRAD3            | ENSG00000126458         | RRAS               |
| ENSG00000073861                                                                                        | TBX21              | ENSG00000147155         | EBP                | ENSG00000141401         | IMPA2              |
| ENSG00000164929                                                                                        | BAALC              | ENSG00000198055         | GRK6               | ENSG00000161955         | TNFSF13            |
| ENSG00000211751                                                                                        | TRBC1              | ENSG00000163171         | CDC42EP3           | ENSG00000174837         | ADGRE1             |
| ENSG00000163739                                                                                        | CXCL1              | ENSG00000102543         | CDADC1             | ENSG00000197461         | PDGFA              |
| ENSG00000278078                                                                                        | AC025279.2         | ENSG00000141232         | TOB1               | ENSG00000172985         | SH3RF3             |
| ENSG00000261203                                                                                        | AC106782.3         | ENSG00000185201         | IFITM2             | ENSG00000112303         | VNN2               |
| ENSG00000261419                                                                                        | AC145285.4         | ENSG00000109103         | UNC119             | ENSG00000101187         | SLCO4A1            |
| ENSG00000069493                                                                                        | CLEC2D             | ENSG00000106348         | IMPDH1             | ENSG00000130475         | FCHO1              |
| ENSG00000200169                                                                                        | RNU5D-1            | ENSG00000077585         | GPR137B            | ENSG00000174945         | AMZ1               |
| ENSG00000155659                                                                                        | VSIG4              | ENSG00000110046         | ATG2A              | ENSG00000093134         | VNN3               |
| ENSG00000118200                                                                                        | CAMSAP2            | ENSG00000174791         | RIN1               | ENSG00000213889         | PPM1N              |
| ENSG00000140287                                                                                        | HDC                | ENSG00000159496         | RGL4               | ENSG00000153208         | MERTK              |
| ENSG00000262202                                                                                        | AC007952.4         | ENSG00000165752         | STK32C             | ENSG00000162073         | PAQR4              |
| ENSG00000196569                                                                                        | LAMA2              | ENSG00000145476         | CYP4V2             | ENSG00000007968         | E2F2               |
| ENSG00000172183                                                                                        | ISG20              | ENSG00000089060         | SLC8B1             | ENSG00000077522         | ACTN2              |
| ENSG00000224769                                                                                        | MUC20P1            | ENSG00000122122         | SASH3              | ENSG00000172594         | SMPDL3A            |

|                 |            |                 |          |                 |             |
|-----------------|------------|-----------------|----------|-----------------|-------------|
| ENSG00000257506 | AC133555.1 | ENSG00000135363 | LMO2     | ENSG00000142512 | SIGLEC10    |
| ENSG00000166689 | PLEKHA7    | ENSG00000197321 | SVIL     | ENSG00000175489 | LRRRC25     |
| ENSG00000211942 | IGHV3-13   | ENSG00000028137 | TNFRSF1B | ENSG00000169495 | HTRA4       |
| ENSG00000157404 | KIT        | ENSG00000095370 | SH2D3C   | ENSG00000105173 | CCNE1       |
| ENSG00000118513 | MYB        | ENSG00000139182 | CLSTN3   | ENSG00000165548 | TMEM63C     |
| ENSG00000198795 | ZNF521     | ENSG00000018280 | SLC11A1  | ENSG00000105048 | TNNT1       |
| ENSG00000133316 | WDR74      | ENSG00000095015 | MAP3K1   | ENSG00000173372 | C1QA        |
| ENSG00000279602 | AC109326.1 | ENSG00000182957 | SPATA13  | ENSG00000174705 | SH3PXD2B    |
| ENSG00000173193 | PARP14     | ENSG00000032444 | PNPLA6   | ENSG00000234424 | AL353743.4  |
| ENSG00000248323 | LUCAT1     | ENSG00000167552 | TUBA1A   | ENSG00000182885 | ADGRG3      |
| ENSG00000186017 | ZNF566     | ENSG00000065154 | OAT      | ENSG00000276758 | AC245884.12 |
| ENSG00000196139 | AKR1C3     | ENSG00000160883 | HK3      | ENSG00000002933 | TMEM176A    |
| ENSG00000166881 | NEMP1      | ENSG00000088992 | TESC     | ENSG00000205213 | LGR4        |
| ENSG00000203761 | MSTO2P     | ENSG00000167083 | GNGT2    | ENSG00000244405 | ETV5        |
| ENSG00000184988 | TMEM106A   | ENSG00000144579 | CTDSP1   | ENSG00000134061 | CD180       |
| ENSG00000125459 | MSTO1      | ENSG00000134256 | CD101    | ENSG00000108950 | FAM20A      |
| ENSG00000013374 | NUB1       | ENSG00000106789 | CORO2A   | ENSG00000198719 | DLL1        |
| ENSG00000179344 | HLA-DQB1   | ENSG00000198879 | SFMBT2   | ENSG00000007312 | CD79B       |
| ENSG00000152784 | PRDM8      | ENSG00000146094 | DOK3     | ENSG00000106565 | TMEM176B    |
| ENSG00000124813 | RUNX2      | ENSG00000120949 | TNFRSF8  | ENSG00000110079 | MS4A4A      |
| ENSG00000124575 | HIST1H1D   | ENSG00000105639 | JAK3     | ENSG00000173369 | C1QB        |
| ENSG00000152518 | ZFP36L2    | ENSG00000111144 | LTA4H    | ENSG00000261701 | HPR         |
| ENSG00000169131 | ZNF354A    | ENSG00000072274 | TFRC     | ENSG00000169715 | MT1E        |
| ENSG00000142961 | MOB3C      | ENSG00000186074 | CD300LF  | ENSG00000135424 | ITGA7       |
| ENSG00000092929 | UNC13D     | ENSG00000105612 | DNASE2   | ENSG00000257017 | HP          |
| ENSG00000160796 | NBEAL2     | ENSG00000100373 | UPK3A    | ENSG00000125144 | MT1G        |
| ENSG00000106868 | SUSD1      | ENSG00000159640 | ACE      | ENSG00000170439 | METTL7B     |
